# Supplementary material for: An internet-based bioinformatics toolkit for plant biosecurity diagnosis and surveillance of viruses and viroids
Source: PubMed Central journal article supplement (PMC5225587; doi:10.1186/s12859-016-1428-4), 2017-01-11
Supplement: 12859_2016_1428_MOESM2_ESM.pdf [file 12859_2016_1428_MOESM2_ESM.pdf]

# Toolkit for Plant Biosecurity Diagnosis and Surveillance of Viruses and Viroids – USER GUIDE

---

## Table of Contents

|                                                                             |           |
|-----------------------------------------------------------------------------|-----------|
| <b>Background to Yabi .....</b>                                             | <b>3</b>  |
| Log in .....                                                                | 3         |
| The Design Tab.....                                                         | 3         |
| <i>The left panel, which displays the available tools .....</i>             | <i>3</i>  |
| <i>The middle panel, where you build a workflow .....</i>                   | <i>3</i>  |
| <i>The right panel, where you select files or change parameters .....</i>   | <i>3</i>  |
| <i>Build a workflow part 1 .....</i>                                        | <i>4</i>  |
| <i>Build a workflow part 2 .....</i>                                        | <i>5</i>  |
| <i>Build a workflow part 3 .....</i>                                        | <i>6</i>  |
| <i>Select a file part 1 .....</i>                                           | <i>7</i>  |
| <i>Select a file, part 2 .....</i>                                          | <i>8</i>  |
| <i>Set tool parameters .....</i>                                            | <i>9</i>  |
| The Jobs Tab .....                                                          | 10        |
| <i>The left panel, which displays the list of jobs.....</i>                 | <i>10</i> |
| <i>The middle panel, which displays the tools used in the workflow.....</i> | <i>10</i> |
| <i>The right panel, which displays the output.....</i>                      | <i>10</i> |
| <i>Jobs running .....</i>                                                   | <i>11</i> |
| <i>File outputs part 1 .....</i>                                            | <i>12</i> |
| <i>File outputs part 2 .....</i>                                            | <i>13</i> |
| The Files Tab .....                                                         | 14        |
| <i>Transfer files.....</i>                                                  | <i>15</i> |
| The Account Tab.....                                                        | 16        |
| <i>Change password.....</i>                                                 | <i>17</i> |
| <b>The WorkFlows - Overview .....</b>                                       | <b>18</b> |
| <i>Available pipelines .....</i>                                            | <i>18</i> |
| <i>Virus and Viroid Detection and Detection of Novel Viroids .....</i>      | <i>19</i> |
| <i>Mapping to Reference Genome.....</i>                                     | <i>20</i> |
| <b>The WorkFlows – Tool Details .....</b>                                   | <b>21</b> |
| Virus and Viroid Detection and Detection of Novel Viroids .....             | 21        |
| <i>Tool 1: Select File.....</i>                                             | <i>21</i> |
| <i>Tool 2: ConDeTri.....</i>                                                | <i>21</i> |
| <i>Tool 3: Extract reads (21-25nt, 21-22nt, or 24nt) .....</i>              | <i>21</i> |
| <i>Tool 4: Spades 3.5 Wrapper .....</i>                                     | <i>21</i> |
| <i>Tool 5: CAP3 pipeline .....</i>                                          | <i>22</i> |
| <i>Tool 6: Extract and rename contigs .....</i>                             | <i>22</i> |
| <i>Tool 7: blastn (virus, viroid and plant) .....</i>                       | <i>22</i> |
| <i>Tool 8: blastx (virus and plant) .....</i>                               | <i>23</i> |

|                                                                 |           |
|-----------------------------------------------------------------|-----------|
| Tool 9: Extract blast hits .....                                | 23        |
| Tool 10: Extract contigs- plant, virus, no hits .....           | 24        |
| Tool 11: PLANT blastn output.....                               | 24        |
| Tool 12: VIRUS blastn output.....                               | 24        |
| Tool 13: PLANT blastx output.....                               | 24        |
| Tool 14: VIRUS blastx output.....                               | 24        |
| Tool 15: Filter contigs 200-460nt.....                          | 24        |
| Tool 16: Identify circular contigs.....                         | 25        |
| Mapping to Reference Genome .....                               | 25        |
| Tool 1: Select File.....                                        | 25        |
| Tool 2: bowtie-build.....                                       | 25        |
| Tool 3: bowtie.....                                             | 25        |
| Tool 4: samtools view.....                                      | 25        |
| Tool 5: samtools sort.....                                      | 26        |
| Tools 6: samtools index.....                                    | 26        |
| <b>The WorkFlows – Output Files Details .....</b>               | <b>27</b> |
| Virus and Viroid Detection and Detection of Novel Viroids ..... | 27        |
| Tool 1: Select File.....                                        | 27        |
| Tool 2: ConDeTri .....                                          | 27        |
| Tool 3: Extract reads (21-25nt, 21-22nt, or 24nt) .....         | 27        |
| Tool 4: Spades 3.5 Wrapper .....                                | 27        |
| Tool 5: CAP3 pipeline.....                                      | 28        |
| Tool 6: Extract and rename contigs .....                        | 28        |
| Tool 7: blastn (virus, viroid and plant) .....                  | 28        |
| Tool 8: blastx (virus and plant).....                           | 28        |
| Tool 9: Extract blast hits .....                                | 28        |
| Tool 10: Extract contigs- plant, virus, no hits .....           | 28        |
| Output tools: .....                                             | 29        |
| Tool 11: PLANT blastn output.....                               | 29        |
| Tool 12: VIRUS blastn output.....                               | 30        |
| Tool 13: PLANT blastx output.....                               | 30        |
| Tool 14: VIRUS blastx output.....                               | 30        |
| Tool 15: Filter contigs 200-460nt.....                          | 30        |
| Tool 16: Identify circular contigs.....                         | 30        |
| Mapping to Reference Genome .....                               | 30        |
| Tool 1: Select File.....                                        | 30        |
| Tool 2: bowtie-build.....                                       | 30        |
| Tool 3: bowtie.....                                             | 31        |
| Tool 4: samtools view.....                                      | 31        |
| Tool 5: samtools sort.....                                      | 31        |
| Tools 6: samtools index.....                                    | 31        |
| <b>References .....</b>                                         | <b>31</b> |

## Background to Yabi

### Log in

Navigate to the site <https://ccgapps.com.au/yabi/login/?next=/yabi/> and log in with your supplied username and password.

If you have forgotten your password, contact the Yabi team by email at: [yabi@ccg.murdoch.edu.au](mailto:yabi@ccg.murdoch.edu.au)

### The Design Tab

The Design Tab is where you create workflows, or select saved workflows. The Design Tab has three panels:

*The left panel, which displays the available tools*

- You may search for tools in 'Find tool'
- Click 'show all' to show all tools
- 'Use selection to auto filter' may be turned on or off as desired
- Click on a tool to view a description, and the types of files it accepts and outputs.
- Press 'add' or drag and drop tools to the middle panel to build a workflow.
- Saved workflows are available at the bottom of this panel

*The middle panel, where you build a workflow*

- Tools or workflows added from the left panel appear here
- Drag and drop tools in the order required
- Click on each tool to select files or change parameters in the far right panel.
- The default options for each parameter automatically, but can be changed in most cases
- Use the 'Tags' feature to mark your workflows to enhance searching
- 'Save' the workflow to reuse it at a later date
- Name your workflow
- Click 'run' when you are ready to run your workflow
- Note that mandatory fields are marked red if they are not correctly filled. Your job will not be able to be submitted until mandatory fields are correctly filled.

*The right panel, where you select files or change parameters*

- Mandatory and common parameters appear first
- To see all available parameters, click 'show all options'

### Build a workflow part 1

Workflows are built by dragging and dropping or adding the tools listed on the left into the workflow panel.

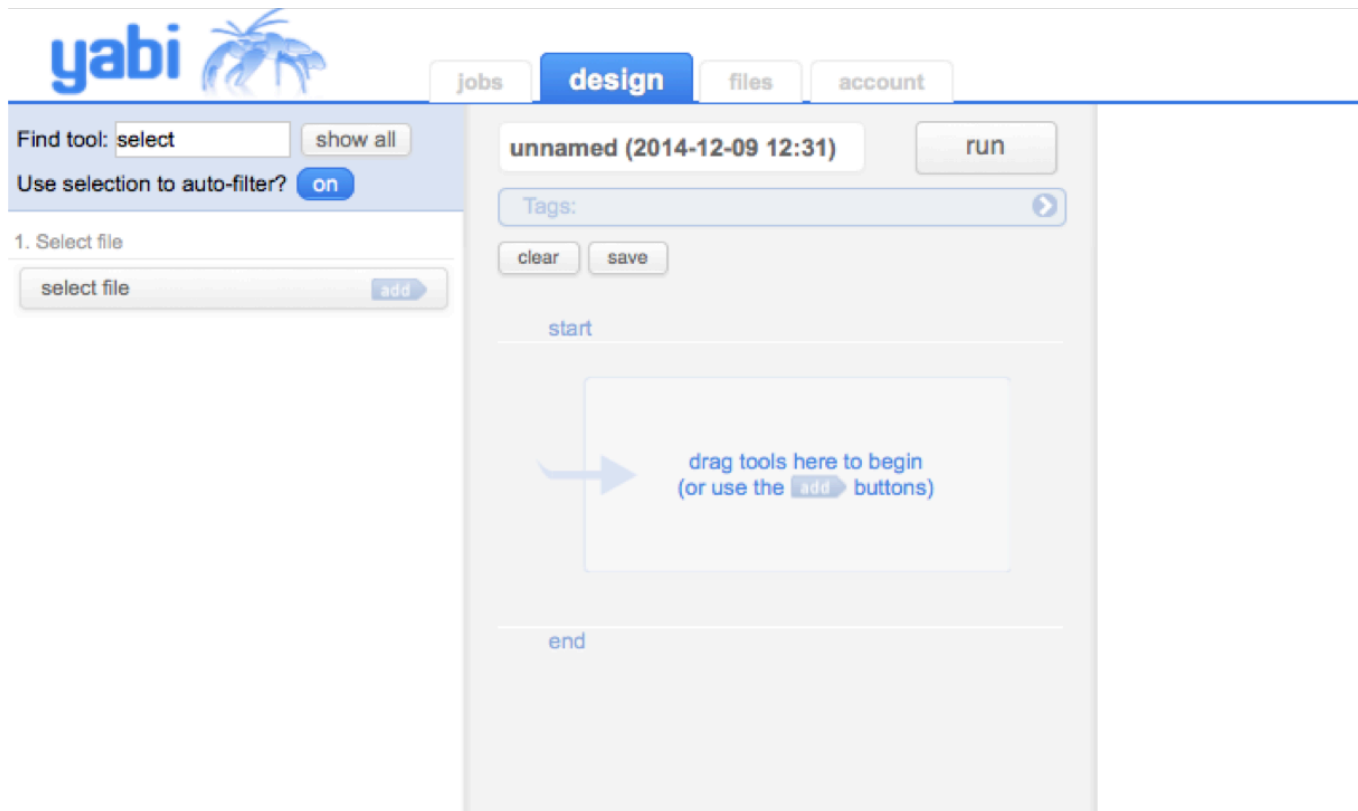

The screenshot shows the Yabi web interface for building workflows. At the top left is the Yabi logo, which includes the word "yabi" in a blue sans-serif font and a stylized blue insect icon. To the right of the logo are four navigation tabs: "jobs", "design" (which is highlighted in blue), "files", and "account". Below the navigation is a search bar with the text "Find tool: select" and a "show all" button. Underneath the search bar is a toggle switch for "Use selection to auto-filter?" which is currently set to "on".

The main workspace is divided into two panels. The left panel, titled "1. Select file", contains a "select file" button and an "add" button. The right panel, titled "unnamed (2014-12-09 12:31)", contains a "run" button, a "Tags:" input field with a right-pointing arrow, and "clear" and "save" buttons. The workflow area is bounded by "start" and "end" labels. A large light-blue box in the center contains the text "drag tools here to begin (or use the add buttons)" with a blue arrow pointing to the left.

## Build a workflow part 2

Click on 'show all' to show the list of all available tools, and turn 'Use selection to auto-filter' off to show all available tools.

The image displays two overlapping screenshots of the YABI web interface. The top screenshot shows the 'design' tab with a workflow named 'unnamed (2014-12-09 12:31)'. The 'Find tool' dropdown is set to 'select', and the 'Use selection to auto-filter?' toggle is turned 'on'. A blue arrow points to the 'show all' button. The bottom screenshot shows the same interface after clicking 'show all', with the 'Use selection to auto-filter?' toggle turned 'off'. A large blue arrow points from the 'show all' button in the top screenshot to the 'show all' button in the bottom screenshot. The tool list in the bottom screenshot is as follows:

- 1. Select file
  - select file
- 2. Quality and trim
  - ConDeTri
- 3. Assemblers and extract contigs
  - CAP3 Wrapper
  - Extract and rename contigs
  - MetaVelvet
  - SPAdes v3.0.0
  - Spades Wrapper
  - Velvetg
  - Velveth
- 4. Blast+
  - blastn virus
  - blastx virus
  - blastn plant
- 5. Output files (R scripts)
  - PLANT blastn output
  - VIRUS blastn output
  - VIRUS blastx output
- 6. Comparison Tools
  - QUAST

### Build a workflow part 3

Add a tag to your workflow (optional) by clicking on the arrow to the right. Multiple tags should be separated by a comma. Name your workflow (optional).

The screenshot shows the yabi workflow design interface. The top navigation bar includes 'jobs', 'design', 'files', and 'account'. The 'design' tab is active, showing a workflow editor for 'unnamed (2016-07-05 17:53)'. The workflow starts with a 'start' button, followed by a box for adding tools, and ends with an 'end' button. A 'run' button is located at the top right of the workflow editor. A 'Tags' field is positioned below the 'run' button, with a right-pointing arrow next to it. A blue arrow points to this right-pointing arrow. A callout box titled 'what are tags?' is overlaid on the right side of the image, providing instructions on how to use tags. The callout box contains the following text:

**what are tags?**  
Tags are a great way to keep track of your workflows.  
You can tag when creating a workflow. For example:  
Tags: `project:neptune, client:CCGI`  
You can tag a workflow that has already run:  
Tags: `success, discovery, project:n`  
You can even tag workflows while they are running!  
To find all your workflows by tag, simply type part of the tag name into the Find: box at the top-left of the jobs page.

### Select a file part 1

Clicking on the tool in the tool panel displays a description. Red boxes indicate mandatory options that need to be filled in (i.e. select a file). To select a file, first click on the 'Select file' Tool in the middle panel. Then, click on the folder of choice in the right panel. The arrow takes you back to the root file system.

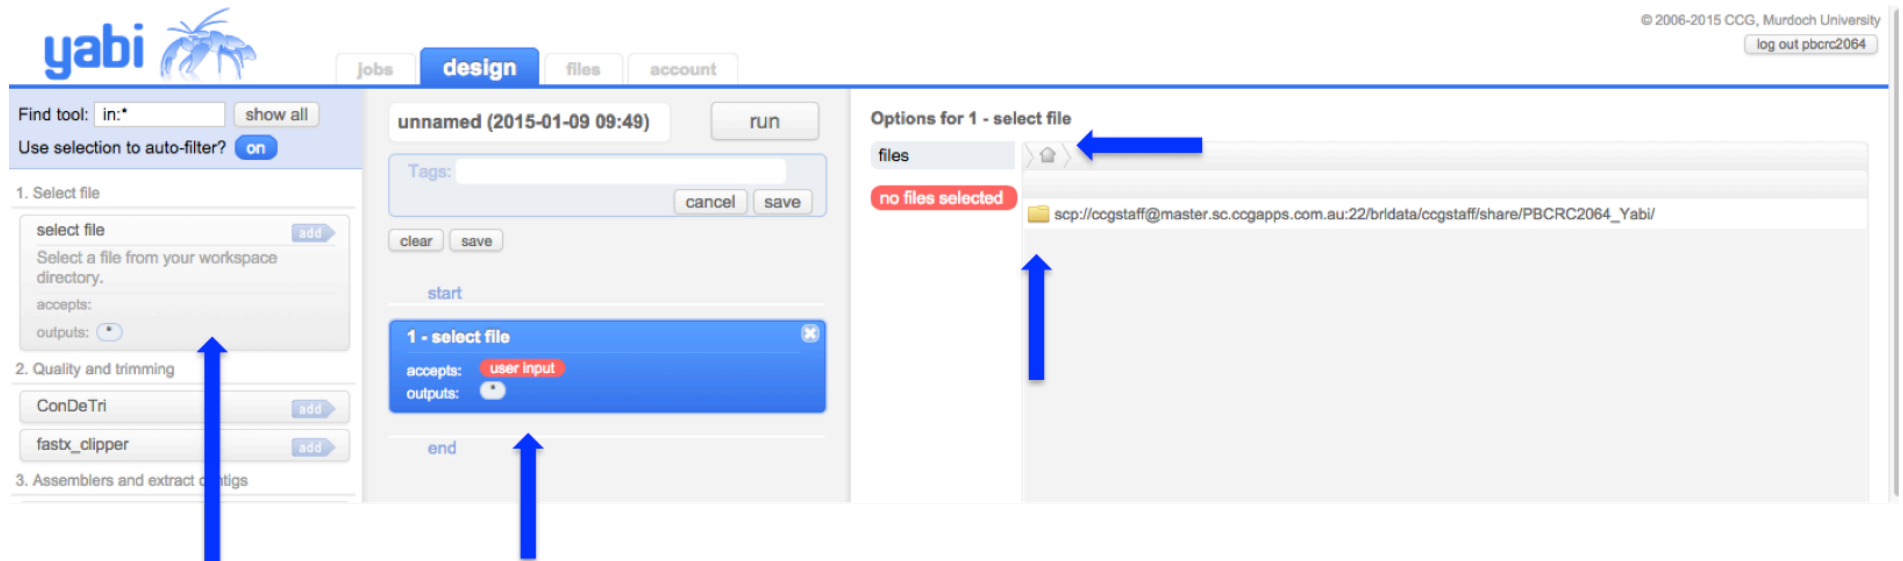

## Select a file, part 2

Files can be previewed by clicking the magnifying glass icon. Files can also be uploaded from your desktop by clicking 'Select File' and 'Upload'. Multiple files can be selected.

The screenshot displays the yabi web interface. At the top left is the yabi logo. The navigation bar includes 'jobs', 'design' (active), 'files', and 'account'. The top right shows the copyright notice '© 2006-2015 CCG, Murdoch University' and a 'log out pbcrc2064' button.

The main interface is divided into several sections:

- Find tool:** A search bar with 'in:\*' and a 'show all' button.
- Use selection to auto-filter?** A toggle switch set to 'on'.
- 1. Select file:** A section with a 'select file' button and an 'add' button. Below it, instructions state 'Select a file from your workspace directory.' and 'accepts:'. There are also 'clear' and 'save' buttons.
- 2. Quality and trimming:** A section with 'ConDeTri' and 'fastx\_clipper' buttons, each with an 'add' button.
- 3. Assemblers and extract contigs:** A section with an 'add' button.

In the center, there is a job configuration area for 'unnamed (2015-01-09 09:49)'. It includes a 'run' button, a 'Tags:' field with 'cancel' and 'save' buttons, and a 'start' button. Below this, a blue box labeled '1 - select file' shows 'accepts: user input' and 'outputs:'. An 'end' button is at the bottom.

On the right, there are two 'Options for 1 - select file' panels:

- The top panel shows a file browser view for 'scp://ccgstaff@master.sc.ccgapps.com.au:22/brldata/ccgstaff/share/PBCRC2064\_Yabi/'. It displays 'no files selected' and a magnifying glass icon.
- The bottom panel shows a file browser view for 'scp://yabidemo@master.sc.ccgapps.com.au:22/yabidata/yabi1/'. It displays 'no files selected' and a list of files:

| File Name                                    | Size   | Icon |
|----------------------------------------------|--------|------|
| PB64-S1_C43HMACXX_AGTCC_L005_R1_subset.fastq | 0.1 kB | 🔍    |
| PB64-S1_clean_subset.fastq                   | 0.1 kB | 🔍    |
| PB64-S2_clean_subset.fastq                   | 0.1 kB | 🔍    |

Blue arrows highlight the magnifying glass icon in the top panel and the 'Select Files' button in the bottom panel.



### Set tool parameters

File types that are accepted by the tool are listed in the tool description and in the right panel. Click 'Show all options' to show all available tool parameters. Click on 'run' when you are ready to submit your workflow.

The screenshot displays the YABI workflow design interface. On the left, the 'design' tab is active, showing a workflow named 'unnamed (2015-04-15 12:07)'. The workflow consists of two steps: '1 - select file' and '2 - FastQC (starcluster ex)'. The 'FastQC' step is highlighted in blue. Its 'accepts' field lists file extensions: \*.fastq, \*.fastq.gz, \*.fq, \*.fq.gz, \*.gz, \*.txt, and \*.txt.gz. The 'outputs' field is set to 'user input'. A 'run' button is visible at the top right of the workflow panel.

On the right, a panel titled 'Options for 2 - FastQC' shows a list of file selection options: 'PB64-S1\_clean\_subset.fastq (1 - select file)', 'PB64-S2\_clean\_subset.fastq (1 - select file)', and '1 - select file'. Below this list, a row of file type filters is shown: \*.gz, \*.fq, \*.fq.gz, \*.gz, \*.txt, and \*.txt.gz. A 'show all options' button is located at the top right of this panel. A tooltip explains: 'When multiple files have been selected. Using the "1 - select file" option will cause fastqc to iterate over all the selected files. Individual files can be done by selecting the appropriate file.'

Four blue arrows point to key elements: one to the 'run' button, one to the 'show all options' button, one to the '1 - select file' option in the file selection list, and one to the 'FastQC' step in the workflow design panel.

## The Jobs Tab

The Jobs Tab is where you view the results of completed workflows, or those currently running workflows. The Jobs Tab has three panels:

*The left panel, which displays the list of jobs*

- All submitted workflows are displayed here
- A green tick means the workflow has successfully completed
- A yellow exclamation point indicates an error has occurred in the workflow- this may simply mean more time is required to complete a step
- A red cross sign indicates the workflow was not able to complete
- A spinning wheel indicates a job is currently running.
- Search for jobs through the 'Find' text box, or utilise the date and status buttons to search
- Click on the job to see the tools used in the workflow appearing in the middle panel

*The middle panel, which displays the tools used in the workflow*

- If a job is still running, the green bar indicates how far the workflow has progressed
- The workflow may be re-used, saved, aborted, or shared

*The right panel, which displays the output*

- Output files for each tool can be previewed or downloaded
- The tool options used are saved and may also be viewed

### Jobs running

Previously run jobs may be found through a search of job name, date range, or run status. Workflows may be reused, saved, aborted or shared with others. Green ticks indicate the job/task has completed successfully, while the spinning wheel indicates the job/task is currently running.

The screenshot displays the YABI web interface. At the top left is the YABI logo. A navigation bar contains tabs for 'jobs', 'design', 'files', 'account', and 'admin'. Below the navigation bar is a search area with a 'Find:' input field, a 'Date range:' selector set to 'today', and a 'Status:' filter with buttons for 'All', 'Ready', and 'Complete'. A table lists a job named 'fastqc\_S1\_S2' with a date of '2016-03-18' and a green tick icon. To the right, a detailed view of the workflow 'fastqc\_S1\_S2' is shown. It includes a 'Tags:' field, buttons for 're-use', 'save as', and 'abort', and a 'share with others' option. The workflow steps are: '1 - select file' (completed with a green tick) and '2 - fastqc (master.sc.ccgapps.com.au EX (ccgstaff))' (currently running with a green progress bar and a spinning wheel icon). A status bar at the bottom indicates 'workflow running, waiting for completion...'. Blue arrows point to the 'abort' button and the 'fastqc' step.

© 2006-2016 CCG,

## File outputs part 1

File outputs can be previewed by clicking the blue magnifying glass, or downloaded by clicking the green arrow.

The screenshot displays the YABI web interface. On the left, a sidebar shows a job named 'fastqc\_S1\_S2' with a status of 'Ready' and a completion date of '2015-04-13'. The main panel is divided into three sections: 'file outputs', 'options', and 'remote status'. The 'file outputs' section lists the following files and folders:

| File/Folder                 | Size     | Preview | Download |
|-----------------------------|----------|---------|----------|
| 1                           |          |         |          |
| ▫ PB64-S1_subset_fastqc     |          | ✖       | ⬇        |
| 📄 PB64-S1_subset_fastqc.zip | 283.3 kB | ✖       | ⬇        |
| 📄 Y29019.e253876            | 1.0 kB   | ✖       | ⬇        |
| 📄 Y29019.o253876            | 0.1 kB   | ✖       | ⬇        |
| 📄 Y29019.pe253876           | 0.0 kB   | ✖       | ⬇        |
| 📄 Y29019.po253876           | 0.0 kB   | ✖       | ⬇        |

Blue arrows point to the magnifying glass icon next to the folder 'PB64-S1\_subset\_fastqc' and the download icon next to the file 'Y29019.po253876'.

## File outputs part 2

The tool options that were used are also captured, and may be viewed.

The screenshot displays the yabi web interface. At the top left is the yabi logo. The top navigation bar includes 'jobs', 'design', and 'files'. In the top right corner, there is a copyright notice '© 2006-2015 CCG, Murdoch University' and a 'log out yabi11' button.

The main content area is divided into three tabs: 'file outputs', 'options', and 'remote status'. The 'options' tab is currently selected and highlighted in blue. Below the tabs, a list of files is shown: 'PB64-S1\_subset.fastq.gz' and 'PB64-S2\_subset.fastq.gz'. A blue arrow points upwards from the bottom of the page towards the 'options' tab.

On the left side, there is a sidebar with search and filter options. The 'jobs' section shows a job named 'fastqc\_S1\_S2' with a status of 'demo' and a completion date of '2015-04-13'. Below this, a list of steps is shown: '1 - select file' and '2 - FastQC (starcluster ex)', both with green checkmarks indicating completion.

### **The Files Tab**

The Files Tab is where you view your Backends (links to various high performance computing resources) and files. The split screen allows files able to be dragged and dropped between different back ends. Files may also be uploaded from your desktop.

### Transfer files

To transfer files between directories or backends, drag and drop files from the right to the left, or left to the right panels. Files can be deleted by clicking the 'cross', previewed by clicking the 'blue magnifying glass' or downloaded by clicking the 'green arrow'.

The screenshot displays the yabi web interface. At the top left is the yabi logo with a bee icon. Navigation tabs include 'jobs', 'design', 'files' (which is active), and 'account'. The top right shows the copyright notice '© 2006-2015 CCG, Murdoch University' and a 'log out yabi1' button. Below the navigation is a header bar with the path 'scp://yabidemo@master.sc.ccgapps.com.au:22/yabidata/yabi1/'. Two side-by-side file panels show a list of files and folders. Each file entry includes a folder icon, a file icon, a size (e.g., 0.1 kB), a blue magnifying glass icon, and a green arrow icon. A large blue curved arrow points from the right panel to the left panel, indicating a transfer direction. A smaller blue arrow points from the right panel to the left panel, and another blue arrow points to the bottom right of the right panel.

| File Name               | Size   | Actions |
|-------------------------|--------|---------|
| PB64-S1                 |        | ✕ 📄     |
| PB64-S1_subset_pipeline |        | ✕ 📄     |
| PB64-S2                 |        | ✕ 📄     |
| PB64-S2_subset_pipeline |        | ✕ 📄     |
| PB64-S1_clean.fq.gz     | 0.1 kB | 🔍 ⬇     |
| PB64-S1_subset.fastq.gz | 0.1 kB | 🔍 ⬇     |
| PB64-S2_clean.fq.gz     | 0.1 kB | 🔍 ⬇     |
| PB64-S2_subset.fastq.gz | 0.1 kB | 🔍 ⬇     |
| PB64-S3_clean.fq.gz     | 0.1 kB | 🔍 ⬇     |
| PB64-S4_clean.fq.gz     | 0.1 kB | 🔍 ⬇     |
| PB64-S5_clean.fq.gz     | 0.1 kB | 🔍 ⬇     |
| PB64-S7_clean.fq.gz     | 0.1 kB | 🔍 ⬇     |

### **The Account Tab**

The Account Tab is where you may change your password.



### Change password

You may change your password by navigating to the Accounts Tab.

© 2006-2016 CCC

yabi 

jobs design files **account** admin

user options **change password**

#### Change Password

This form is used to change the password you use to log into YABI itself. It does not have any effect on your backend credentials.

current password:

new password:

The new password must be at least six characters in length.

confirm new password:

# The WorkFlows - Overview

## Available pipelines

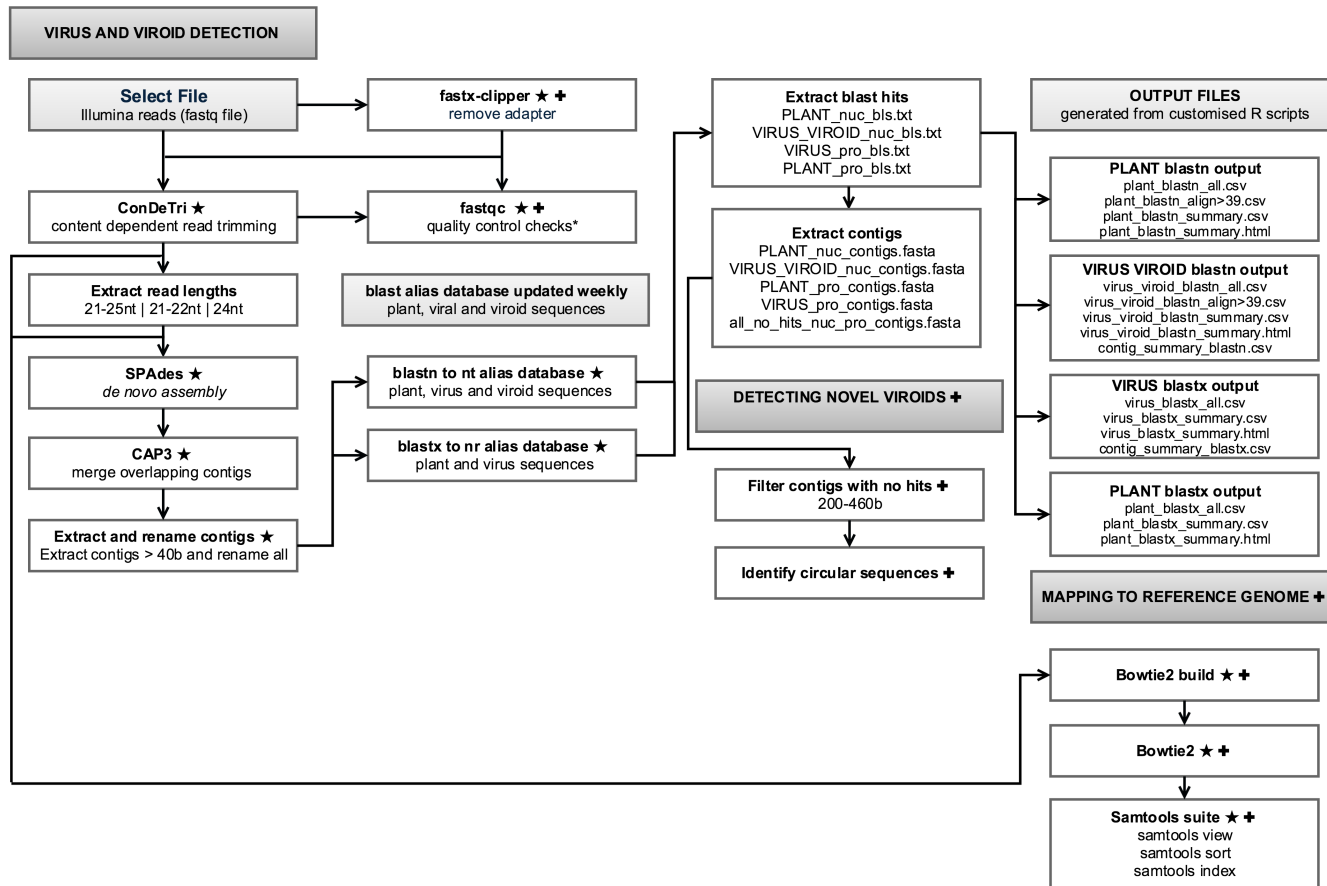

### *Virus and Viroid Detection and Detection of Novel Viroids*

There are three versions of this workflow, utilising:

- 21-25nt reads
- 21-22nt reads
- 24nt reads

The workflows are saved, and accessed from the Design Tab Tools Panel under 'Saved Workflows'. Simply select the workflow of interest, select your file of reads, and run the workflow.

1 – select file

2 – ConDeT

3 - Extract reads (21, 22, or 24nt length)

4 - Spades 3

5 – CAP3

6 – Extract and rename

7 – blastn

8 – blastx

9 – Extract blast

10 – Extract contigs

11 – Bowtie map

12- PLANT blastn

13 – VIRUS blastn

14 – PLANT blastx

15 – VIRUS blastx

16 – Filter contigs 2

17 – Identify circular

### *Mapping to Reference Genome*

This workflow can be utilised to map reads to viruses or viroids identified in the detection of viruses and viroids workflow.

1 - Select file

2 - Bowtie2 build

3 - Samtools view

4 - Samtools sort

5 - Samtools index

## The WorkFlows – Tool Details

The saved workflows are accessed from the Design Tab Tools Panel under 'Saved Workflows'. Simply select the workflow of interest, select your file of reads (Tool 1), and run the workflow.

### Virus and Viroid Detection and Detection of Novel Viroids

#### *Tool 1: Select File*

Select your FASTQ file from the directory, or upload from your desktop.

#### *Tool 2: ConDeTri*

ConDeTri is a content dependent read trimmer for Illumina Data. It trims FASTQ reads from the 3'-end and extract reads (or read pairs) of good quality. If the reads are paired, the filtering is done pairwise, and if one read in a pair has low quality, the remaining read is saved as single end.

Default parameters are used for the following options:

- -hq (high quality threshold, 25)
- -lq (low quality threshold, 10)
- -frac (Fraction of read that must exceed hq, 0.8)
- -mh (When this no of consecutive hq bases is reached, the trimming stops, 5)
- -ml (Max no of lq bases allowed after a stretch of hq bases from 3'-end, 1)
- -cutfirst (Remove i first bases from the 5'end, 0)
- -rmN (Remove non-ATCG bases from 5'end before any trimming, no)

Optimised parameters used for the following options:

- -fastq1 (Fastq(.gz) file, automatically selects from Tool 1, Select File)
- -sc (Illumina scoring table, 33)
- -minlen (Min allowed read length, 18)
- -prefix (Prefix for the output file(s), sample)

#### *Tool 3: Extract reads (21-25nt, 21-22nt, or 24nt)*

In house script extracts reads of stated lengths from ConDeTri trimmed reads (automatically selected from Tool 2, ConDeTri).

#### *Tool 4: Spades 3.5 Wrapper*

SPAdes is a *de novo* genome assembler that uses k-mers for building the initial de Bruijn graph. It then performs graph-theoretical operations which are based on graph structure, coverage and sequence lengths, and adjusts errors iteratively.

The following options are used:

- -o (directory to store all the resulting files, SPAdes\_outpt)

- -memory (memory RAM limit for SPAdes in Gb (terminates if exceeded), 250)
- -k (comma-separated list of k-mer sizes, 15, 17, 19)
- -s (file with unpaired reads, automatically selects from Tool 3, Extract reads).

#### *Tool 5: CAP3 pipeline*

CAP3 is a DNA sequence assembly program that is used to assemble overlapping contigs (generated from SPAdes *de novo* assembly). The input file is automatically selected from Tool 4 (Spades 3.5 Wrapper).

Parameters optimised for short reads are used as follows:

- -o (specify overlap length cutoff > 15, 16)
- -p (specify overlap percent identity cutoff N > 65, 90)
- -i (specify segment pair score cutoff N > 20, 30)
- -s (specify overlap similarity score cutoff N > 250, 300)
- -j (specify chain score cutoff N > 30, 31)

#### *Tool 6: Extract and rename contigs*

In house script extracts contigs of a minimum length and renames them. This is used as CAP3 (Tool 5) renames overlapping contigs that are assembled.

The following parameters are used:

- -i (input file of contigs, automatically selected from Tool 6 (CAP3 pipeline))
- -n (The minimum number of bases, 40)
- -a (The name of the assembly used to rename the contigs, spades\_cap3\_CONTIG)

#### *Tool 7: blastn (virus, viroid and plant)*

Blastn searches nucleotide databases using a nucleotide query. A custom nucleotide database is created from an in house script that extracts plant, virus and viroid sequences from the blast nt database using the following queries:

- Plant nucleotide: txid33090[orgn]
- Virus nucleotide: txid10239[orgn] NOT txid131567[orgn]
- Viroid nucleotide: txid12884[orgn]

The following blastn parameters are used:

- -query (input file, automatically selected from Tool 6 (Extract and rename contigs))
- -db (BLAST database name, plant, viruses and viroids (as described above))
- -out (output file name, all\_nt\_bls.txt)
- -evalue (expectation value E, 0.0000000001)
- -task (sets the parameters (e.g., word-size or gap values) to typical values for a specific type of search, blastn-short)

- -outfmt (alignment view options, customised tabular with subject title and query coverage per subject '6 qseqid sgi sacc length pident mismatch gapopen qstart qend qlen sstart send slen sstrand evalue bitscore qcovhsp stitle staxids qseq sseq')
- -max\_target\_seqs (maximum number of aligned sequences to keep, 5)
- -strand (query strand(s) to search against database/subject, both)

*Tool 8: blastx (virus and plant)*

Blastx searches protein databases using a translated nucleotide query. A custom protein database is created from an in house script that extracts plant and virus sequences from the blast nr database using the following queries:

- Plant protein: txid33090[orgn]
- Virus protein: txid10239[orgn] NOT txid131567[orgn]

The following blastn parameters are used:

- -query (input file, automatically selected from Tool 6 (Extract and rename contigs))
- -db (BLAST database name, plant and viruses nr (as described above))
- -out (output file name, all\_nt\_bls.txt)
- -evalue (expectation value E, 0.000000001)
- -outfmt (alignment view options, customised specified options, tabular '6 qseqid sgi sacc length pident mismatch gapopen qstart qend qlen sstart send slen evalue bitscore qcovhsp stitle staxids qseq sseq')
- -max\_target\_seqs (maximum number of aligned sequences to keep, 5)
- -strand (query strand(s) to search against database/subject, both)
- -query\_gencode (G genetic code to use to translate query, standard)

*Tool 9: Extract blast hits*

In house script extracts blast hits into virus and viroid nucleotide hits, virus protein hits, virus protein hits, and plant nucleotide hits.

An in house script extracts plant, virus and viroid GI numbers from the blast nt and nr databases using the queries described above.

The following options are automatically set:

- -v (viroids and viruses nuc GI)
- -p (plant nuc GI)
- -g (virus pro GI)
- -h (plant pro GI)

The following input files are automatically selected from Tool 7 (blastn) and Tool 8 (blastx)

- -n (all\_nt\_bls.txt)
- -r (all\_nr\_bls.txt)

*Tool 10: Extract contigs- plant, virus, no hits*

An in house script extracts the contigs from blast hits.

The following input files are automatically selected from various tools:

- -f (all\_contigs\_rename.fasta, automatically selected from Tool 6 (extract and rename contigs))
- -p (PLANT\_nuc\_bls.txt, automatically selected from Tool 9 (Extract blast hits))
- -v (VIRUS\_VIROID\_nuc\_bls.txt, automatically selected from Tool 9 (Extract blast hits))
- -g (PLANT\_pro\_bls.txt, automatically selected from Tool 9 (Extract blast hits))
- -a (all\_nt\_bls.txt, automatically selected from Tool 7 (blastn))
- -b (all\_nr\_bls.txt, automatically selected from Tool 8 (blastx))

*Tool 11: Bowtie mapping*

An in house script maps the FASTQ file of input reads (taken from the raw file of reads (Tool 1), or ConDeTri qc'd reads (Tool 2), or read lengths of various sizes (Tool 3)) to the contigs that have hits to virus sequences from blastn and blastx (VIRUS\_VIROID\_nuc\_contigs.fasta and VIRUS\_pro\_contigs.fasta, Tool 10).

*Tool 12: PLANT blastn output*

An in house script summarises the plant blastn output. The input file is (PLANT\_nuc\_bls.txt) is automatically selected from Tool 9 (Extract blast hits).

*Tool 13: VIRUS blastn output*

An in house script summarises the virus and viroid blastn output. The input file (VIRUS\_VIROID\_nuc\_bls.txt) is automatically selected from Tool 9 (Extract blast hits).

*Tool 14: PLANT blastx output*

An in house script summarises the plant blastx output. The input file is (PLANT\_pro\_bls.txt) is automatically selected from Tool 9 (Extract blast hits).

*Tool 15: VIRUS blastx output*

An in house script summarises the virus blastx output. The input file (VIRUS\_pro\_bls.txt) is automatically selected from Tool 9 (Extract blast hits).

*Tool 16: Filter contigs 200-460nt*

An in house script filters contigs with no hits to nucleotide or protein sequences, that are between 200-460 nt in length. The input file (all\_no\_hits\_nuc\_pro\_contigs.fasta) is automatically selected from Tool 10 (Extract contigs- plant, virus, no hits).



#### *Tool 17: Identify circular contigs*

An in house script identifies circular contigs that may indicate novel viroid sequences. Input file (contigs\_no\_hits\_200-460.fasta) is automatically selected from Tool 15 (Filter contigs 200-460nt).

Additional screening of any contigs identified with tools such as RFAM, miRBase, tRNAscaen-SE and RNAfold is recommended.

### Mapping to Reference Genome

#### *Tool 1: Select File*

Upload the FASTA file of the genome of interest (obtained from NCBI). Select your FASTQ/FASTA file of reads from the directory, or upload from your desktop.

#### *Tool 2: bowtie-build*

Bowtie[1] is an ultrafast, memory-efficient short read aligner geared toward quickly aligning large sets of short DNA sequences (reads) to large genomes. Bowtie-build builds the index of the FASTA file of the genome of interest.

The following parameters are used:

- inputFile (FASTA file of the genome of interest is automatically selected from Tool 1: Select File)
- outfileBase (The base string to use for the output files, outfile\_base)

#### *Tool 3: bowtie*

Bowtie aligns the reads to the genome of interest.

The following parameters are used:

- -q (query input files are FASTQ .fq/.fastq, yes)
- -v (3)
- -m (suppress all alignments if > n exist, 1)
- --best (hits guaranteed best stratum; ties broken by quality, yes)
- -S (write hits in SAM format, yes)
- ebwt (The basename of the index for the reference genome, outfile\_base)
- -indexes (Dummy parameter to select bowtie2 index files, automatically selected from Tool 2: bowtie-build)

#### *Tool 4: samtools view*

SAMtools[2] provide various utilities for manipulating alignments in the SAM format, including sorting, merging, indexing and generating alignments in a per-position format.

The following parameters are used:

- -o Output file (e.g. \*.bam, outfile\_base)

- InputFile (Input File in SAM or BAM format, automatically selected from Tool 3 (bowtie))
- -b (Output bam file, yes)

*Tool 5: samtools sort*

The following parameters are used:

- InputFile (Input file to sort, automatically selected from Tool 4 (samtools view))
- outPutPrefix (Prefix to use in file name, sorted)

*Tools 6: samtools index*

The following parameters are used:

- InputFile (Input file in bam format, automatically selected from Tool 5 (samtools index))

## The WorkFlows – Output Files Details

To obtain the result files for each workflow, select the workflow of interest from the Jobs tab. Click on the Tool of interest in the middle (workflow) panel and then preview or download the output file of interest from the right (output) panel. To preview the output file, click on the file name or blue magnifying glass in the 'file outputs tab'. While previewing the output file, you may also download or navigate to the preview of the next or previous output files. To download, click on the grey down arrow. To navigate to the preview of the previous or next output file, click on the left or right arrows. To exit out of the preview screen, click the grey cross.

To download the output file from the file outputs tab, click on the green arrow. Depending on the web browser or operating system in use, the file may download directly to your web browser and downloads folder, or you may receive an option to save or open the file in a relevant program (such as excel for a .csv file).

Files that are 0.0 kB in size are empty. Files ending in '.o' or '.po' contain verbose details as Tools progress (not all Tools record verbose output). Files ending in '.e' or '.pe' contain error messages resulting from the Tool.

### Virus and Viroid Detection and Detection of Novel Viroids

#### *Tool 1: Select File*

- File of reads selected

#### *Tool 2: ConDeTri*

- Sample.stats contains basic statistics:
  - Number of reads in original file
  - Number of bases original file
  - Number of paired reads after trimming
  - Number of bases in pairs after trimming
  - Number of unpaired reads after trimming
  - Number of unpaired bases after trimming
- Sample\_trim.fastq contains the reads retained after trimming

#### *Tool 3: Extract reads (21-25nt, 21-22nt, or 24nt)*

- \*nt\_reads.fq contains the reads retained of the relevant length (21-25nt, 21-22nt, or 24nt)

#### *Tool 4: Spades 3.5 Wrapper*

- contigs.fasta contains the contigs produced from SPAdes. This is the file used in additional steps of the workflow
- SPAdes\_output directory contains all output pertaining to the SPAdes tool
- Output files in the main directory are the combined kmer results

- Individual kmer directories (such as K15, K17, K19) contain the output files for individual kmer runs
- corrected/ directory contains reads corrected by BayesHammer in \*.fastq.gz files; if compression is disabled, reads are stored in uncompressed \*.fastq files
  - configs – configuration files for read error correction
  - corrected.yaml – internal configuration file
- before\_rr.fasta and before\_rr.fastg - contigs before repeat resolution
- contigs.fasta contains resulting contigs
- contigs.fastg resulting contigs in FASTG format
- dataset.info – internal configuration file
- input\_dataset.yaml – internal YAML data set file
- params.txt – information about SPAdes parameters in this run
- scaffolds.fasta contains resulting scaffolds
- scaffolds.fastg resulting scaffolds in FASTG format
- spades.log – SPAdes log
- warnings.log – warnings log

*Tool 5: CAP3 pipeline*

- all\_contigs.fasta contains the resulting contigs from CAP3 (combined contigs and singles)

*Tool 6: Extract and rename contigs*

- all\_contigs\_rename.fasta contains the renamed contigs

*Tool 7: blastn (virus, viroid and plant)*

The following blastn parameters are used:

- all\_nt\_bls.txt contains the blast output in tabular format

*Tool 8: blastx (virus and plant)*

- all\_nr\_bls.txt contains the blast output in tabular format

*Tool 9: Extract blast hits*

- PLANT\_nuc\_bls.txt – blastn results with hits to plant sequences
- PLANT\_pro\_bls.txt – blastx results with hits to plant sequences
- VIRUS\_VIROID\_nuc\_bls.txt – blastn results to virus and viroid sequences
- VIRUS\_pro\_bls.txt – blastx results to virus sequences

*Tool 10: Extract contigs- plant, virus, no hits*

- PLANT\_nuc\_contigs.fasta – contigs with blastn hits to plant sequences
- PLANT\_pro\_contigs.fasta – contigs with blastx hits to plant sequences
- VIRUS\_VIROID\_nuc\_contigs.fasta – contigs with blastn hits to virus and viroid sequences

- VIRUS\_pro\_contigs.fasta – contigs with blastx hits to virus sequences
- all\_hits\_nuc\_pro\_contigs.fasta – contigs with blastn and blastx hits to plant, virus and viroid sequences
- all\_no\_hits\_nuc\_pro\_contigs.fasta – contigs with no hits to plant and virus sequences from blastn and blastx

*Tool 11: Bowtie mapping output*

- nuc\_contigs\_mapped\_reads\_number.txt
- pro\_contigs\_mapped\_reads\_number.txt

*Output tools:*

- The following tools produce the output files of most interest:
- \*summary.csv and \*summary.html files summarise the virus, viroid or plant sequences detected, the number of contigs hits, alignment lengths, average % ID, and % coverage by contigs. The \*.html files provide ease of viewing results within Yabi. The \*.csv files can be downloaded and opened in Excel.
  - The total contig lengths (summed) and estimated potential contig coverage (%) columns are estimates only, designed to provide additional information on the length of contig versus the alignment length. For example, if a contig has an alignment to a viral sequence that is 80b, but the contig itself is 2000b in length, it may indicate that the virus is not truly present. Additionally, it may highlight a novel virus.
  - Note that the total contigs summed may include the same contig length added together in cases of multiple hits to a particular viral sequence by the same contig
- Note that the detection of a particular virus/viroid sequence detailed in this file does not necessarily indicate presence of the virus/viroid. For example, one contig may have hits to multiple, closely related, virus or viroid sequences (the top 5 hits are reported in blast output).
- contigs\_summary\_blast\*.csv files summarise the details of contigs with blast hits. Use this file to check if a contig has hits to multiple viruses/viroids in order to determine if a virus/viroid is present.
- \*blast\*\_all.csv files are the same blast results in tabular format (from Tools 7 or 8), but with a header added for explanation
- \*blastn\_align>39b.csv is a subset of results (only reports alignments of greater than 39b in length) from the \*blastn\_all.csv files. This file is then used to produce the \*\_blastn\_summary.csv and \*\_blastn\_summary.html files.

*Tool 12: PLANT blastn output*

- plant\_blastn\_all.csv
- plant\_blastn\_align>39b.csv
- plant\_blastn\_summary.csv

- plant\_blastn\_summary.html

*Tool 13: VIRUS blastn output*

Note: this output reports both viruses and viroids

- virus\_blastn\_all.csv
- virus\_blastn\_align>39b.csv
- virus\_blastn\_summary.csv
- virus\_blastn\_summary.html
- contig\_summary\_blastn.csv

*Tool 14: PLANT blastx output*

- plant\_blastx\_all.csv
- plant\_blastn\_summary.csv
- plant\_blastn\_summary.html

*Tool 15: VIRUS blastx output*

- virus\_blastx\_all.csv
- virus\_blastx\_summary.csv
- virus\_blastx\_summary.html
- contig\_summary\_blastx.csv

*Tool 16: Filter contigs 200-460nt*

- contigs\_no\_hits\_200-460.fasta – this file contains contigs that have no hits from blastn or blastx that are 200-460b in length

*Tool 17: Identify circular contigs*

- circular\_contigs.fasta – contains potential novel viroid sequences. SPAdes produces ‘circular’ contigs that have hits to viroid sequences. Additional screening of any contigs identified with tools such as RFAM, miRBase, tRNAscaen-SE and RNAfold is recommended.

## Mapping to Reference Genome

*Tool 1: Select File*

- FASTA/FASTQ files selected

*Tool 2: bowtie-build*

- \*.ebwt – the bowtie build reference index files

*Tool 3: bowtie*

- \*.sam – the file containing the details of the mapping of reads to the contigs

*Tool 4: samtools view*

- \*.bam – conversion of the \*.sam file into \*.bam format for sorting

*Tool 5: samtools sort*

- \*sorted.bam – alignments are sorted by leftmost coordinates

*Tools 6: samtools index*

- \*sorted.bam.bai – Indexes the coordinate-sorted BAM file for fast random access.

## References

1. Langmead, B. and S.L. Salzberg, *Fast gapped-read alignment with Bowtie 2*. Nature methods, 2012. **9**(4): p. 357-359.
2. Li, H., et al., *The sequence alignment/map format and SAMtools*. Bioinformatics, 2009. **25**(16): p. 2078-2079.
