# Supplementary material for: An internet-based bioinformatics toolkit for plant biosecurity diagnosis and surveillance of viruses and viroids
Source: PubMed Central journal article supplement (PMC5225587; doi:10.1186/s12859-016-1428-4), 2017-01-11

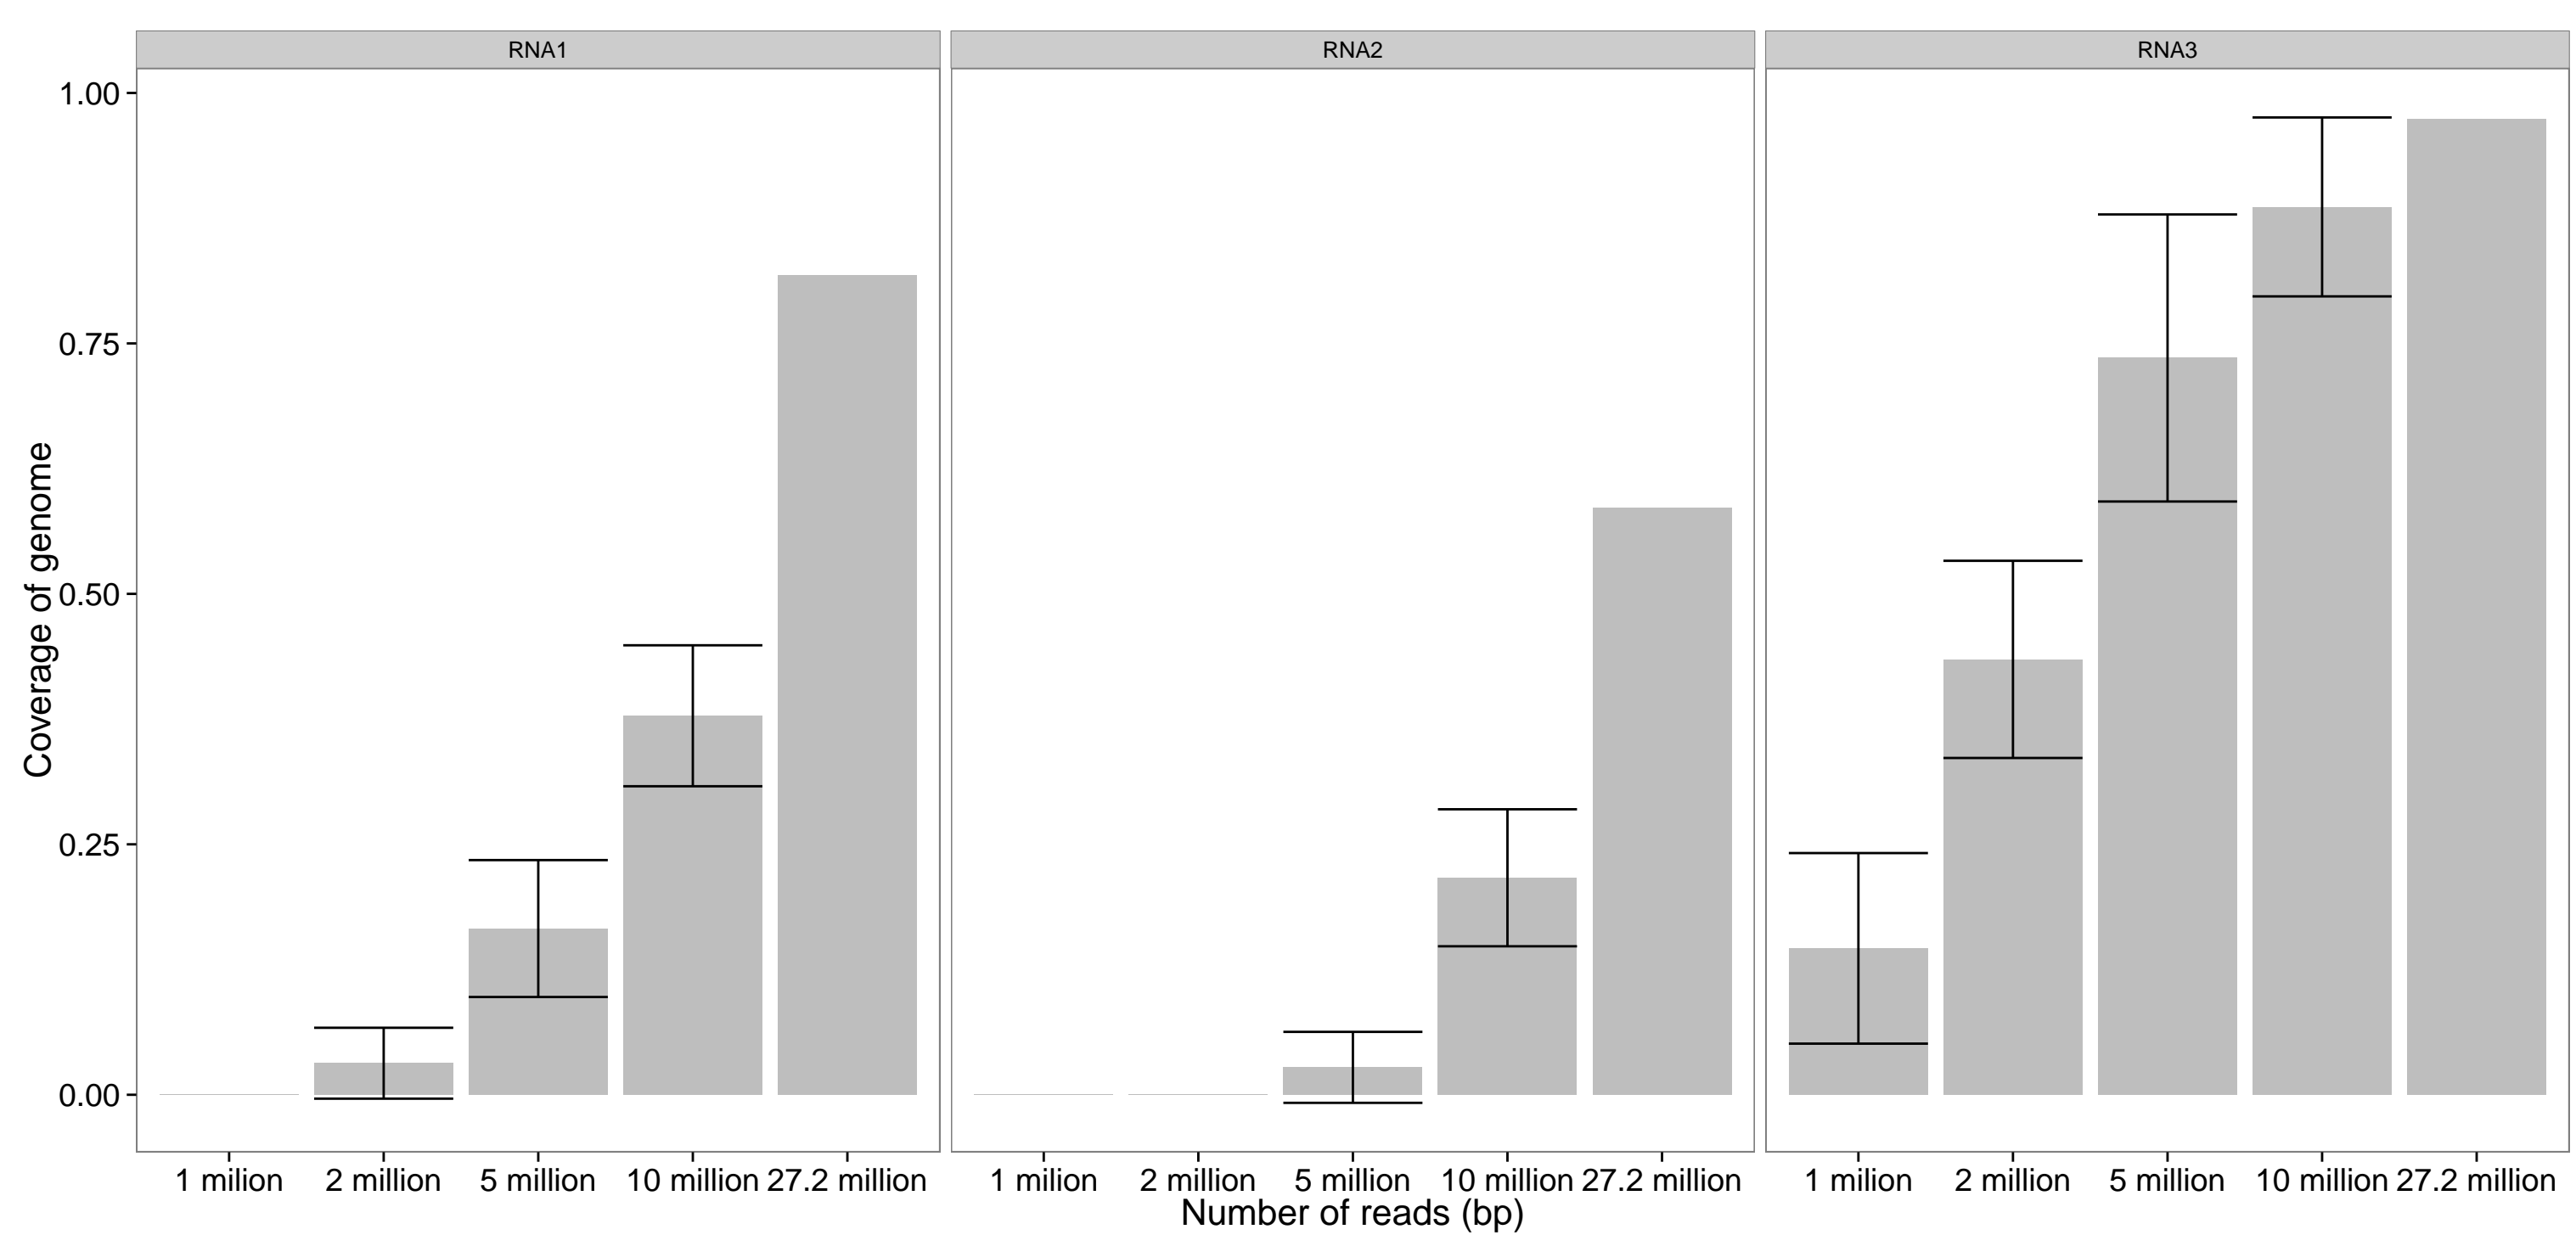

Supplement: 12859_2016_1428_MOESM10_ESM.pdf [file 12859_2016_1428_MOESM10_ESM.pdf]
